# Supplementary material
Source: HighWire-hosted journal article supplement (http://pharmrev.aspetjournals.org/highwire/filestream/24584/field_highwire_adjunct_files/0/863_supp_figs.pdf)
Supplement: 863_supp_figs.pdf [file 863_supp_figs.pdf]

## Supplementary data

### Halogenated Antimicrobial Agents to Combat Drug-Resistant Pathogens

Olajide Sunday Faleye<sup>§</sup>, Bharath Reddy Boya<sup>§</sup>, Jin-Hyung Lee, and Jintae Lee\*

School of Chemical Engineering, Yeungnam University, 280 Daehak-Ro,

Gyeongsan, 38541, Republic of Korea (O.S.F., B.R.B., J-H.L., and J.L)

<sup>§</sup>These authors contributed equally to this work as first authors.

\*Corresponding Author

**Running title:** Halogenated Antimicrobial Agents

#### Address correspondence to

Jintae Lee, School of Chemical Engineering, Yeungnam University

280 Daehak-Ro, Gyeongsan, Gyeongbuk, 38541, Republic of Korea

E-mail: [jtlee@ynu.ac.kr](mailto:jtlee@ynu.ac.kr). Tel.: +82-53-810-2533. Fax: +82-53-810-4631

The authors have no conflict of interest to declare.

**Figure 1.** Structures of halogenated polyphenols and essential oil compounds. **Catechol:** 6-chlorodopamine methacrylamide (**A**), **magnolol:** 5,5'-dipropyl-3,3'-dibromo-2,2'-biphenyldiol (**B**), (3,3'-dichloro-5,5'-dipropyl-2,2'-biphenyldiol (**C**), 5,5'-dibutyl-3,3'-diiodo-2,2'-biphenyldiol (**D**), 5,5'-diallyl-3,3'-dibromo-[1,1'-biphenyl]-2,2'-diol (**E**), SAR analysis of magnolol derivative (**F**), **resveratrol:** 2-chloro-resveratrol (**G**), 2-bromo-resveratrol (**H**), 4-[(*E*)-2-(4-chlorophenyl)ethenyl]phenol (**I**), **flavonoids:** BrCl-flav (**J**), ClCl-flav (**K**), 8-bromo-2,3-dehydrosilybin AB (**L**), 6,8,21-tribromosilybin A (**M**), 6,8,21-tribromosilybin A (**N**), **thymol:** 4-chlorothymol (**O**), 6-bromothymol (**P**), 4,6-dibromothymol (**Q**), **cinnamaldehyde:** 3-(2,4-dichlorophenyl)-1-(2-methyl-1*H*-benzo[*d*]imidazol-1-yl)prop-2-en-1-one (**R**), 3-(4-fluorophenyl)-1-(2-methyl-1*H*-benzo[*d*]imidazol-1-yl)prop-2-en-1-one (**S**), 4-bromocinnamaldehyde (**T**), 3-(4-bromophenyl)-1-(2-methyl-1*H*-benzo[*d*]imidazol-1-yl)prop-2-en-1-one (**U**), 4-chlorocinnamaldehyde (**V**), 4-fluorocinnamaldehyde (**W**), and 3,4-dichlorocinnamaldehyde (**X**).

**Figure 2.** Structures of halogenated alkaloids. **Indole:** CZ74 (**A**), 5-iodoindole (**B**), 5-bromotrisindoline (**C**), 6-bromotrisindoline (**D**), 4-fluoroindole (**E**), 7-chloroindole (**F**), 4'-(4-chlorophenyl)-3'-[(4-fluorophenyl)carbonyl]-5'-(2-methylpropyl)spiro[indole-3,2'-pyrrolidin]-2(1H)-one (**G**), (3-[2-(6-bromo-2-oxo-2*H*-chromen-3-yl)thiazol-4-yl]-2-(5-chloro-2-phenyl-1*H*-indol-3-yl)thiazolidin-4-one) (**H**), ethyl 1-(4-fluorobenzyl)-2-methyl-5-(3-(piperidin-1-yl)propoxy)-1*H*-indole-3-carboxylate (**I**), 4-chloroindole (**J**), 5-chloroindole (**K**), 5-chloro 2-methyl indole (**L**), 5-fluoroindole (**M**), 7-fluoroindole (**N**), ethyl 1-benzyl-5-(2-fluoro-3-(piperidin-1-yl)propoxy)-2-methyl-1*H*-indole-3-carboxylate (**O**) and ethyl 1-benzyl-5-(3-(4,4-difluoropiperidin-1-yl)propoxy)-2-methyl-1*H*-indole-3-carboxylate (**P**), **streptochlorin:** 4-bromo-5-(1*H*-indol-3-yl)oxazole (**Q**), ethyl 2-(3-(4-bromooxazol-5-yl)-1*H*-indol-1-yl)-2-fluoroacetate (**R**), **quinone and quinoline:** 6-fluoro-2-methyl-1*H*-carbazole (**S**), 6-fluoro-3-methyl-1*H*-carbazole (**T**), 7-bromohydroxyquinoline (**U**), 5,7-dichlorohydroxyquinoline (**V**), 5-(2-chloroquinolin-3-yl)-3-(2,4-dichlorophenyl)-4,5-dihydro-1*H*-pyrazol-1-yl)(pyridin-4-yl)methanone (**W**), bromoquinol (**X**), 3-chloro-2-(5'-deoxy-1',2'-O-isopropylidene-D-xilofuranos-5'-yl)-amino-1,4-naphthoquinone (**Y**) and 3-bromo-2-(methyl-5'-deoxy-2',3'-O-isopropylidene-β-D-ribofuranosid-5'-yl)-amino-1,4-naphthoquinone (**Z**), **4-oxoquinolizine:** 8-((3*S*,4*S*)-3-amino-4-methylpyrrolidin-1-yl)-1-cyclopropyl-7-fluoro-9-methyl-4-oxo-4*H*-quinolizine-3-carboxylic acid - CC-195776 (**A1**), (*R*)-8-(7-amino-5-azaspiro[2.4]heptan-5-yl)-1-cyclopropyl-7-fluoro-9-methyl-4-oxo-4*H*-quinolizine-3-carboxylic acid - CC-195767 (**A2**), 1-cyclopropyl-7-fluoro-8-((4*aS*,7*aS*)-hexahydro-1*H*-pyrrolo[3,4-*b*]pyridin-6(2*H*)-yl)-9-methyl-4-oxo-4*H*-quinolizine-3-carboxylic acid - CC-195820 (**A3**), 8-(4-amino-2,5-difluorophenyl)-1-cyclopropyl-9-methyl-4-oxo-4*H*-quinolizine-3-carboxylic acid -GC-072 (**A4**).

**Figure 3.** Structures of halogenated benzopyrone, phenazine and azoles derivatives. **Coumarins:**

3-(2-bromoacetyl)-2*H*-chromen-2-one (**A**), 6-bromo-3-(2-bromoacetyl)-2*H*-chromen-2-one (**B**), 3-(2,2-dibromoacetyl)-2*H*-chromen-2-one (**C**), 8-dibromo-*N*-4-bromo-2-fluorophenyl-2-oxo-2*H*-chromene-3-carboxamide (**D**), 6,8-dichloro-*N*-4-bromo-2-fluorophenyl-2-oxo-2*H*-chromene-3-carboxamide (**E**), halogenated coumarin-chalcones CC2 (**F**), **phenazines:** 2,4-dibromo-6-chlorophenazin-1-ol (**G**), 2,4,6-tribromophenazin-1-ol (**H**), 2,4,8-tribromo-6-fluorophenazin-1-ol (**I**), 2,4-dibromo-7-(trifluoromethyl)phenazin-1-ol (**J**), 2,4-dibromo-8-(trifluoromethyl)phenazin-1-ol (**K**), 2-bromo-7,8-dichloro-4-iodo-5a,9a-dihydrophenazin-1-ol (**L**), 2,4-dibromo-8-chlorophenazin-1-ol (**M**), 7,8-dichloro-4-iodo-5a,9a-dihydrophenazin-1-ol (**N**), 4-bromo-7,8-dichloro-5a,9a-dihydrophenazin-1-ol (**O**), 2,4-dibromo-7,8-difluorophenazin-1-ol (**P<sub>1</sub>**), 1,3-dibromo-6,7-difluoroacridin-4-ol (**P<sub>2</sub>**), **azoles:** 1-(4-(benzo[d]thiazol-2-ylthio)-3-chlorophenyl)-3-(4-(trifluoromethyl)phenyl)urea (**Q**), 1-(3-chloro-4-((5-chlorobenzo[d]thiazol-2-ylthio)phenyl)-3-(4-(difluorophenyl)urea (**R**), SAR analysis for azoles (**S**), ethyl 5-amino-1-(5-chloro-1,3-benzoxazol-2-yl)-1*H*-1,2-diazole-4-carboxylate (**T**), ethyl 5-amino-1-(5-bromo-1,3-benzoxazol-2-yl)-1*H*-1,2-diazole-4-carboxylate (**U**), *N*-(4-bromophenyl)-2-(4-(((4-fluorophenyl)imino)methyl)phenoxy)methyl)-1*H*-1,2,3-triazol-1-yl)acetamide (**V**), *N*-(4-bromophenyl)-2-(4-(((4-((4-fluorophenyl)imino)methyl)phenoxy)methyl)-1*H*-1,2,3-triazol-1-yl)acetamide (**W**), 3-(5-(((5-(4-chlorophenyl)-6-(ethoxycarbonyl)-3-oxo-7-phenyl-3,5-dihydro-2*H*-thiazolo[3,2-*a*]pyrimidin-2-ylidene)methyl)furan-2-yl)benzoic acid (**X**), -(5-(((5-(4-chlorophenyl)-3-oxo-7-phenyl-3,5-dihydro-2*H*-thiazolo[3,2-*a*]pyrimidin-2-ylidene)methyl)furan-2-yl)benzoic acid (**Y**), and 2-(bis((1-(3,4-dichlorobenzyl)-1*H*-1,2,3-triazol-4-yl)methyl)amino)-6-bromo-1*H*-benzo[de]isoquinoline-1,3(2*H*)-dione (**Z**)-3-(5-(((5-(4-chlorophenyl)-3-oxo-7-phenyl-3,5-dihydro-2*H*-thiazolo[3,2-*a*]pyrimidin-2-ylidene)methyl)furan-2-yl)benzoate (**Z**)-3-(5-

((5-(4-chlorophenyl)-6-(ethoxycarbonyl)-3-oxo-7-phenyl-3,5-dihydro-2*H*-thiazolo[3,2-  
a]pyrimidin-2-ylidene)methyl)furan-2-yl)benzoate (**Z**).

**Figure 4.** Structures of repurposed scaffolds. **Isoniazid:** 2-(2-isonicotinoylhydrazineylidene)-*N*-[4-(trifluoromethoxy)phenyl]propanamide (**A**) and *N*-(4-iodophenyl)-2-(2-isonicotinoylhydrazineylidene)propenamide (**B**), **azo-aspirin:** 2-hydroxy-5-((2-iodophenyl)diazenyl)benzoic acid (**C**), haloperidol (**D**), **pyrrolopyrimidine:** 4-(4-((1-(4-bromophenyl)ethyl)amino)-7*H*-pyrrolo[2,3-*d*]pyrimidin-6-yl)phenol (**E**) and 4-(4-((1-(4-iodophenyl)ethyl)amino)-7*H*-pyrrolo[2,3-*d*]pyrimidin-6-yl)phenol (**F**). SAR for pyrrolopyrimidines (**G**), **phenothiazine:** 3,7-dibromo-10-[2-(1-methylpiperidin-2-yl)ethyl]-10*H*-phenothiazine hydrochloride (**H**), 1,3,7,9-tetrachloro-10-[2-(1-methylpiperidin-2-yl)ethyl]-10*H*-phenothiazine hydrochloride (**I**), **salicylanilide:** niclosamide (**J**), oxyclozanide (**K**), 5-chloro-2-hydroxy-*N*-[4-(trifluoromethyl)phenyl]benzamide (**L**), 5-bromo-2-hydroxy-*N*-[4-(trifluoromethyl)phenyl]benzamide (**M**), 5-chloro-*N*-(4'-bromo-3'-trifluoromethylphenyl)-2-hydroxybenzamide (**N**), 5-chloro-*N*-(4'-chloro-3'-(trifluoromethyl)phenyl)-2-hydroxybenzamide (**O**), 5-chloro-*N*-(4'-chlorophenyl)-2-hydroxybenzamide (**P**), SAR for salicylanilides (**Q**) 5-chloro-*N*-(3,5-dibromophenyl)-2-hydroxybenzamide (**R**), 5-chloro-*N*-(3-fluoro-4-(trifluoromethyl)phenyl)-2-hydroxybenzamide (**S**), 5-bromo-4-chloro-2-hydroxy-*N*-[4-(trifluoromethyl)phenyl]benzamide (**T**).

**Figure 5:** Structures of other halogenated bioactive compounds.  **$\beta$ -nitrostyrene and nitrovinylfuran:** 2-bromo-5-(2-bromo-2-nitrovinyl)furan - Furvina (**A**), bromonitromethane (**B**), 4-bromo- $\beta$ -methyl- $\beta$ -nitrostyrene (**C**), 1-fluoro-4-(nitroprop-1-enyl)benzene (**D**), 1,3-difluoro-4-(nitroprop-1-enyl)benzene (**E**), 2,2-difluoro-3,4-methylenedioxy- $\beta$ -methyl- $\beta$ -nitrostyrene (**F**), and 4-chloro- $\beta$ -nitrostyrene (**G**), **aminothiopines:** 2-(4-chlorobenzylidene)aminothiophene-3-carbonitrile (**H**), 2-(2,6-dichlorobenzylidene)aminothiophene-3-carbonitrile (**I**), 2-(4-bromobenzylidene)aminothiophene-3-carbonitrile (**J**), 6-Octanoyl-2-(2,2,2-trifluoroacetamido)-4,5,6,7-tetrahydrothieno[2,3-c]pyridine-3-carboxylic ethyl ester (**K**), 6-(6-bromohexanoyl)-2-(2,2,2-trifluoro-acetylamino)-4,5,6,7-tetrahydro-thieno [2,3-c] pyridine-3-carboxylic ethyl ester (**L**), **isophthalonitrile:** 4-(benzylamino)-5-chloro-2,6-difluoroisophthalonitrile (**M**),  **$\beta$ -amino amides and alboflavusins (AFN):** diamine derivative 3,5-Br-Ph (**N**), 3,5-CF<sub>3</sub>-Ph (**O**), diguanylated analogues 3,5-Br-Ph (**P**), 3,5-CF<sub>3</sub>-Ph (**Q**), SAR for  $\beta$ -amino amides (**R**), AFN 1 (**S**) and AFN 2 (**T**).
